# Supplementary material
Source: PubMed Central journal article supplement (PMC6474823)
Supplement: NIHMS1520956-supplement-3.pdf [file NIHMS1520956-supplement-3.pdf]

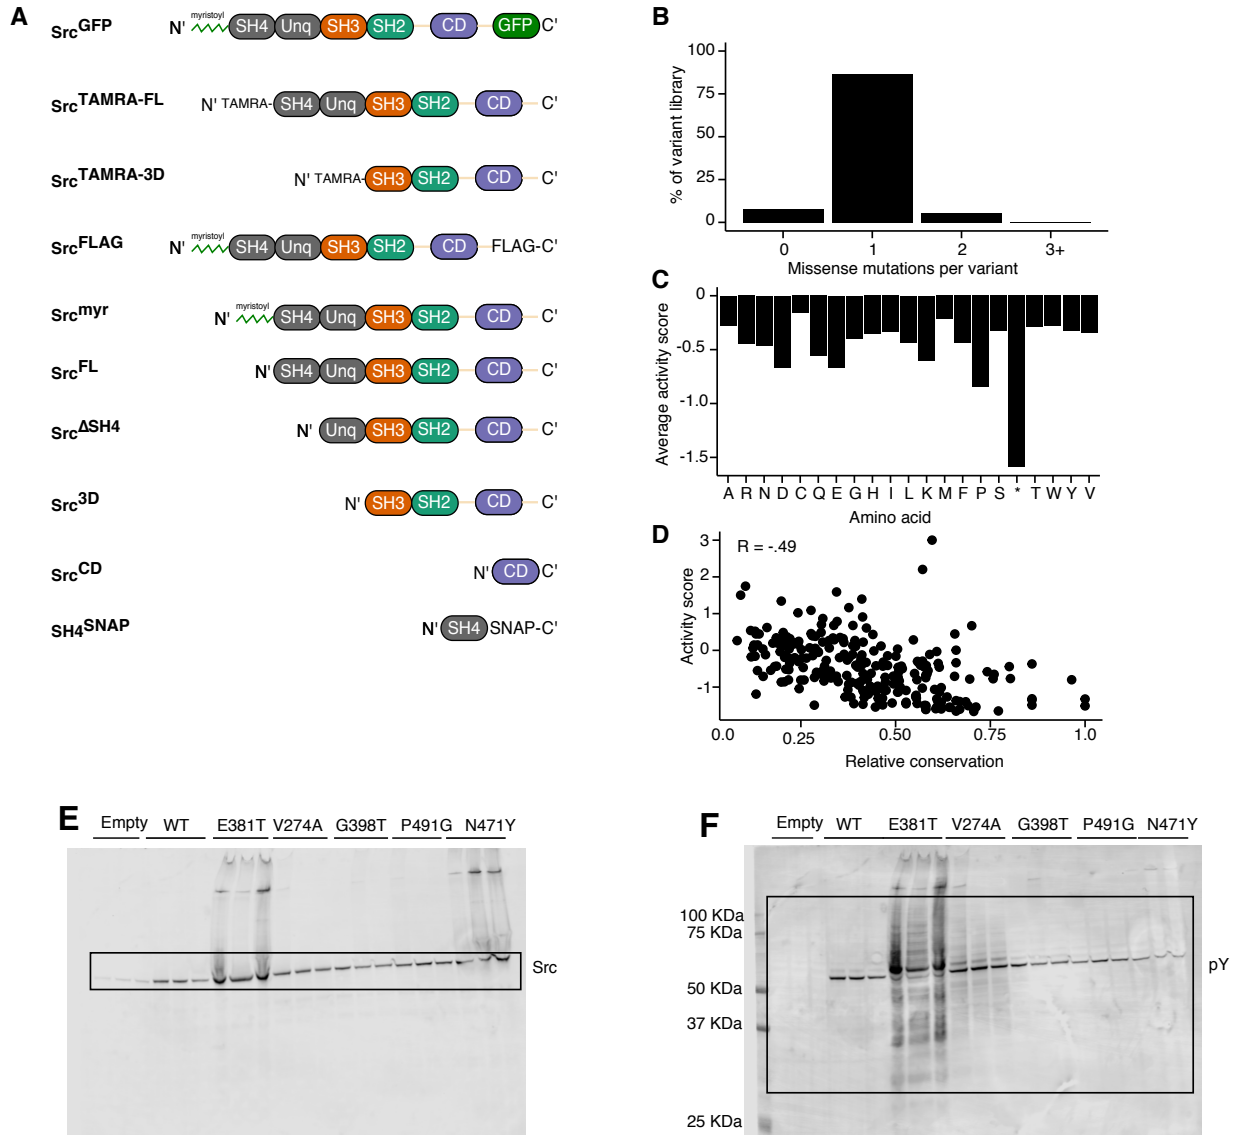

**Figure S1. Deep mutational scan of Src's CD. Related to Figure 2.**

**A.** Schematic of all Src constructs used in this manuscript. Src<sup>GFP</sup> (Expressed in mammalian cells and used in **Figures 3G, S2F, 5A-E, and S4A-D**): Src residues 1-536 with an 8 amino acid C-terminal linker fused to GFP. Src<sup>FLAG</sup> (Expressed in mammalian cells and used in **Figures 4E, 4H (Hck), S3B (Hck), S3G (Hck), 5G, S4H-I, 6B, S5S6B, and S5F**): Src residues 1-536 fused directly to a C-terminal FLAG tag. Src<sup>myr</sup> (Expressed in mammalian cells and *S. cerevisiae*, and used in **Figures 2 (all), S2D-E, S4E-G, 7D (Fyn), S6C (Fyn) and S7D**): Src residues 1-536. Src<sup>FL</sup> (Expressed in *E. coli* and used in **Figures 3C, 3E, S2B-C, 5F, 6C-H, 6K, S5C-D, S5G-I, S5N-O,**

**7B** (Fyn), **7C** (Fyn), and **S6B** (Fyn): Src residues 1-536. Src<sup>3D</sup> (Expressed in *E. coli* and *S. cerevisiae*, and used in **Figures 4C** (Src and Hck), **4G**, **S3A** (Src and Hck), **S3C**, **S3D** (Hck), **6C**, **6G-H**, **S5C-E**, **S5J**, **7B** (Fyn), **7C** (Fyn), **S6B** and **S6D**): Src residues 87-536. Src<sup>SH4</sup> (Expressed in *E. coli* and *S. cerevisiae*, and used in **Figures 6C-E**, **S5C-D**, **S5G-H**, and **S6D**): Src residues 19-536. Src<sup>CD</sup> (Expressed in *E. coli* and used in **Figures 4D**, **S3E** (Hck) and **6I-K**, **S5E**, **S5K** and **S5M**): Src residues 261-536. Src<sup>TAMRA-FL</sup> (Expressed in *E. coli* and used in **Figure S5L**): Src residues 2-536 with an N-terminal TAMRA label. Src<sup>TAMRA-3D</sup> (Expressed in *E. coli* and used in **Figures S3C**, **7F** and **S6E**): Src residues 87-536 with an N-terminal TAMRA label. SH4<sup>SNAP</sup> (Expressed in *E. coli* and used in **Figures 6I-K**, **S5K-O**, **7F** and **S6E**): Src residues 1-18 fused to the N-terminus of SNAP-tag with a short LPETGG linker in between SH4 and SNAP. Relates to **Figures 2-7**. More details for each construct are provided in **Table S1**. **B**. Bar graph of percentage of library members that are WT or have one, two, or three or more amino acid mutations. **C**. Bar graph of average activity score of Src library grouped by mutant amino acid identity. **D**. Scatter plot comparing evolutionary conservation with average activity score at each residue (Pearson's R = -.49). **E**. Representative total Src immunoblot for Src<sup>myr</sup> WT, Src<sup>myr</sup> E381T, Src<sup>myr</sup> V274A, Src<sup>myr</sup> G398T, Src<sup>myr</sup> P491G, and Src<sup>myr</sup> N471Y transiently expressed in HEK293T cells for 24 hr. Relates to **Figure 2I**. **F**. Representative total phospho-tyrosine immunoblot for Src<sup>myr</sup> WT, Src<sup>myr</sup> E381T, Src<sup>myr</sup> V274A, Src<sup>myr</sup> G398T, Src<sup>myr</sup> P491G, and Src<sup>myr</sup> N471Y transiently expressed in HEK293T cells for 24 hr. Relates to **Figure 2I**.

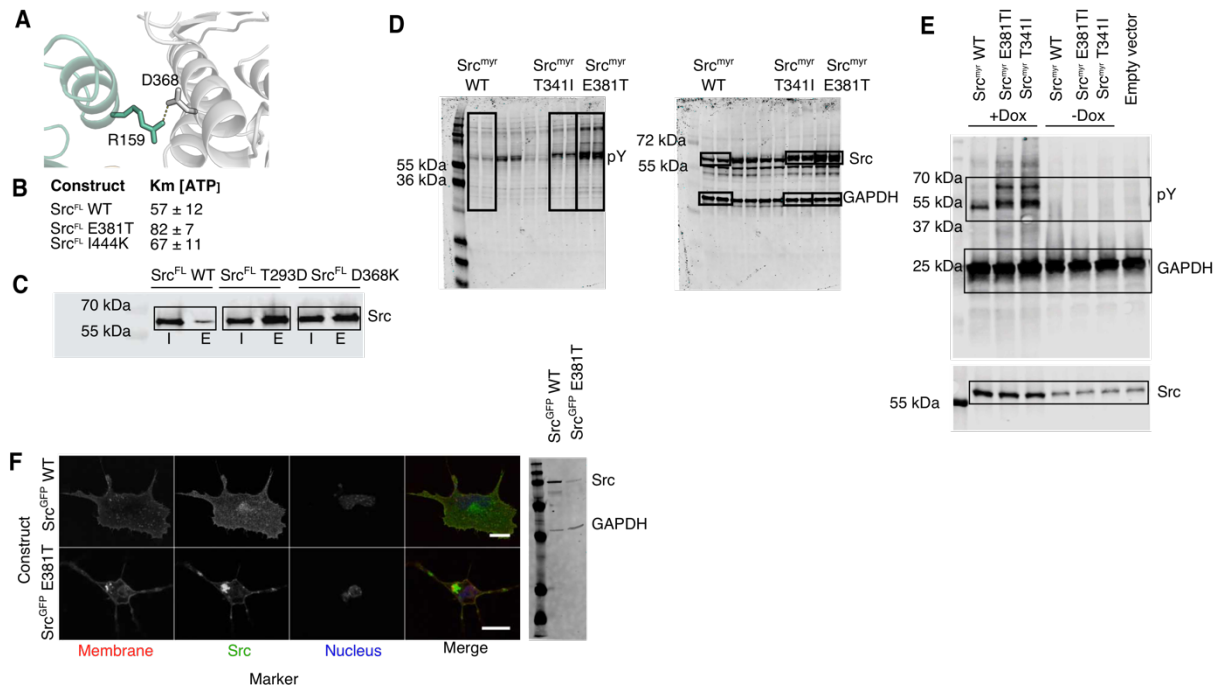

**Figure S2. Interrogation of Src's intramolecular regulatory surfaces.** Related to **Figure 3**.

**A.** Salt bridge formed between R159 (*green*) and D368 (*white*) in Src's closed conformation, PDB:2SRC. Relates to **Figure 3B**. **B.** Measured ATP Michaelis-Menten constants ( $K_m$  [ATP]) for Src<sup>FL</sup> WT, Src<sup>FL</sup> E381T, and Src<sup>FL</sup> I444K ( $n=3$ , mean  $\pm$  s.e.m). Relates to **Figure 3C**. **C.** Total Src immunoblots for SH3 domain pulldown assays performed with Src<sup>FL</sup> WT, Src<sup>FL</sup> T293D, and Src<sup>FL</sup> D368K (I = input Src construct; E = Src construct retained after SH3 pulldown). Retained Src was quantified by fitting the immunoblot signal intensity to a Src titration standard curve. Relates to **Figure 3E**. **D.** Immunoblots showing phospho-tyrosine (pY, (*left panel*)), total Src (*right panel*) and GAPDH of Src<sup>myr</sup> WT, Src<sup>myr</sup> T341I and Src<sup>myr</sup> E381T transiently expressed in SYFs. **E.** Immunoblots showing phospho-tyrosine (pTyr), GAPDH and total Src of transiently expressed Src<sup>myr</sup> WT, Src<sup>myr</sup> E381T, or Src<sup>myr</sup> T341I in HeLa cells under a doxycycline (Dox) inducible promoter. **F.** Representative micrographs comparing the localization of Src<sup>GFP</sup> WT with Src<sup>GFP</sup> E381T in SYFs (*left*). Total Src and GAPDH immunoblot of SYFs transiently expressing Src<sup>GFP</sup> WT or Src<sup>GFP</sup> E381T (same day transfection for both) (*right*).

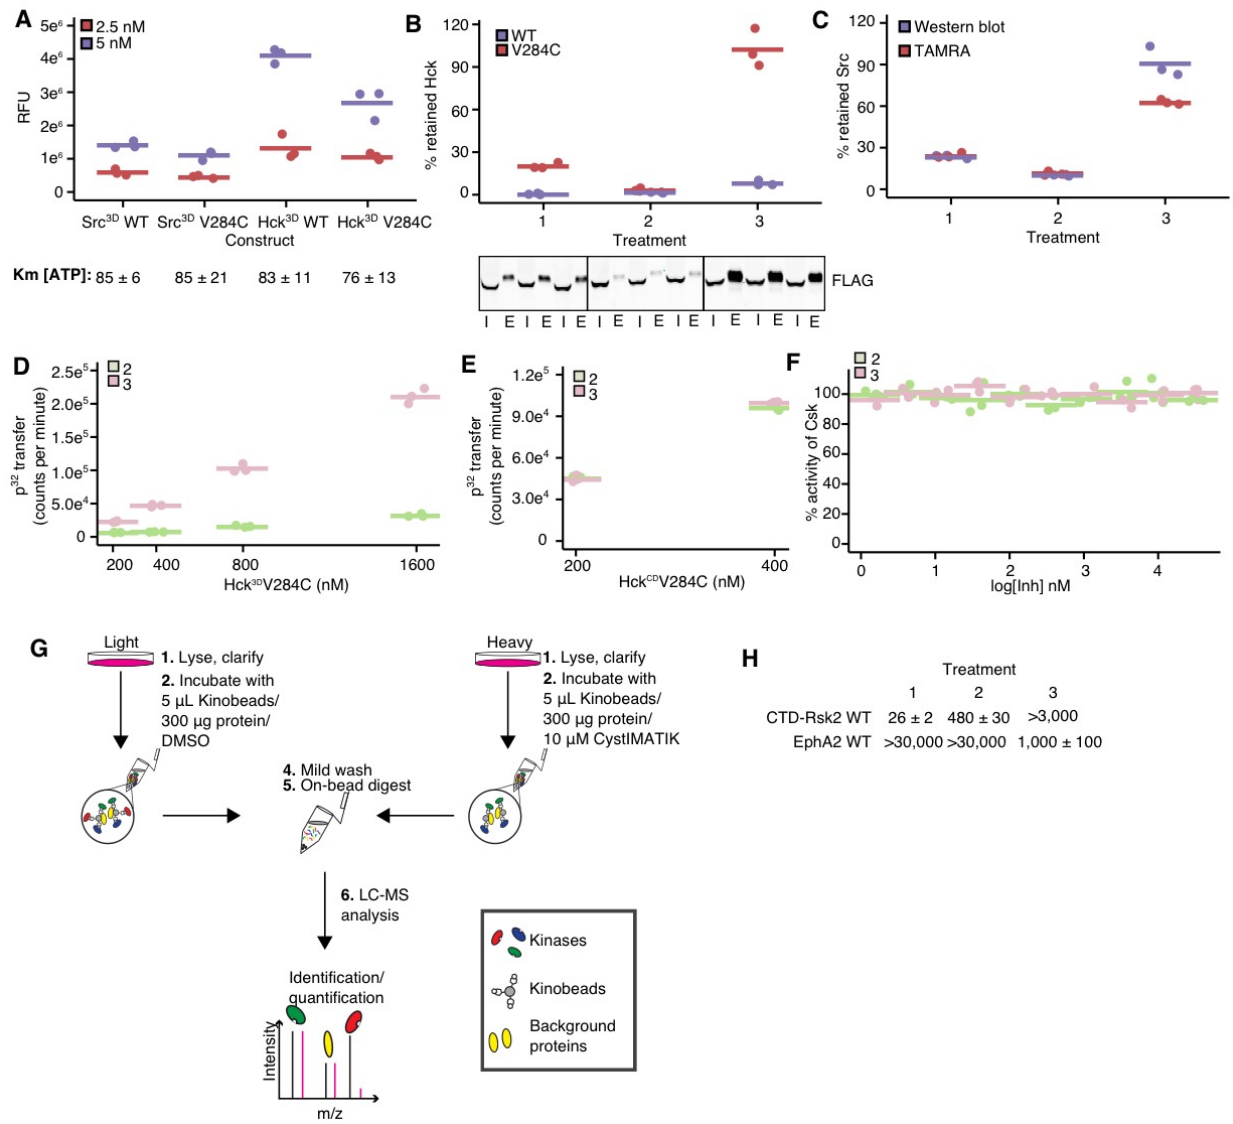

**Figure S3. Development and characterization of CystIMATIK.** Related to **Figure 4**.

**A.** Comparison of the catalytic activities (*top*) and Km [ATP]s (*bottom*) for Src<sup>3D</sup> WT and Src<sup>3D</sup> V284C or Hck<sup>3D</sup> WT and Hck<sup>3D</sup> V284C (n=3). Catalytic activity was measured at either 2.5 nM (*red*) or 5 nM (*purple*) SFK<sup>3D</sup> concentration (n=3). For catalytic activity comparisons, each SFK<sup>3D</sup> was incubated with 20  $\mu$ M of a self-reporting fluorescence SFK peptide (EEEEIYGE-(DAP-Pyrene)-EA) and 1 mM ATP and relative fluorescence units (RFU) was measured after 60 min. Relates to **Figure 4C**. **B.** Quantification of percent retained Hck in the SH3 pulldown assay for HEK293Ts expressing Hck<sup>FLAG</sup> V284C (*red*) (human Src numbering) or Hck<sup>FLAG</sup> WT (*purple*) and treated with 10  $\mu$ M **1**, **2**, or **3** (n=3). Hck was quantified with an anti-FLAG antibody. A representative FLAG

immunoblot for HEK293Ts expressing Hck<sup>FLAG</sup> V284C and treated with **1**, **2**, or **3** is shown (I = input Hck<sup>FLAG</sup> V284C; E = Hck<sup>FLAG</sup> V284C retained after SH3 pulldown). **C.** Quantification of SH3 pulldown for purified Src<sup>3D</sup> V284C (*purple*) or tetramethylrhodamine-labeled Src<sup>TAMRA-3D</sup> V284C (**Figure S1A** and **Table S1**, *red*) complexed to inhibitors **1**, **2**, or **3** (n=3). Retained Src was quantified by fitting the immunoblot signal intensity to a Src (using an anti-Src antibody) titration standard curve. **D.** SH2 domain accessibility assay of the Hck<sup>3D</sup> V284C-**2** (*green*) and Hck<sup>3D</sup> V284C-**3** (*pink*) complexes (n=3). Various concentrations of Hck<sup>3D</sup> V284C-**2** and Hck<sup>3D</sup> V284C-**3** were incubated with Csk (25 nM) and 0.4 μCi/mL γ<sup>32</sup>P-ATP for 60 min. γ<sup>32</sup>P transfer on Y530 (Src numbering) of Hck<sup>3D</sup> V284C by Csk is represented as individual measurements and the horizontal lines indicate the mean of all measurements. Relates to **Figures 4F, 4G**. **E.** SH2 domain accessibility assay of 200 or 400 nM Hck<sup>CD</sup> V284C-**2** (*green*) and Hck<sup>CD</sup> V284C-**3** (*pink*) complexes (n=3) in the presence of Csk (25 nM) and 0.4 μCi/mL γ<sup>32</sup>P-ATP. γ<sup>32</sup>P transfer on Y530 (Src numbering) of Hck<sup>CD</sup> V284C by Csk is represented as individual measurements and the horizontal lines indicate the mean of all measurements. **F.** Activity assay of Csk and an exogenous peptide substrate (Csktide, KKKKEEIYFFFG) in the presence CystIMATIK probes **2** (*green*) or **3** (*pink*) at the concentrations shown (n=3). **G.** Schematic for Kinobead profiling. Hck<sup>FLAG</sup> V284C-expressing HEK293 cells were grown for at least 5 cell doublings in SILAC medium and then lysed and clarified. Lysates were then incubated with a kinobead matrix and DMSO (*left*) or 10 μM CystIMATIK probes **1**, **2**, or **3** (*right*). After mild washing, kinobead matrices (*left* and *right*) were combined, subjected to on-bead digestion, and relative kinase enrichment quantified by LC-MS. **Table S7** lists SILAC ratios and intensity values for proteins and kinases identified and quantified in profiling experiments. Relates to **Figure 4H**. **H.** IC<sub>50</sub> values of CystIMATIK probes **1-3** for WT off-target kinases. Probe **1** is a close structural analog of a selective inhibitor of the C-terminal catalytic domain of the p90 ribosomal protein S6 kinase Rsk2 (CTD-Rsk2; (Serafimova et al., 2012)). The CTD of Rsk2 contains a Cys residue at the position analogous to Val284 in Src and a Thr gatekeeper residue (**Figure 4A**) but Rsk2 was not one of

the ~220 enriched kinases in our kinobead profiling experiment. Therefore, the IC<sub>50</sub> values of CystIMATIK probes 1-3 for CTD-Rsk2 (substrate used: CTDide, sequence RRQLFRGFVAK) were also determined. We also determined the IC<sub>50</sub> values of 1-3 for WT EphA2. IC<sub>50</sub> value determinations for both kinases were performed in the presence of 0.08 μCi/mL γ<sup>32</sup>P-ATP. (n=3, mean ± s.e.m.) Points represent individual measurements and the horizontal lines indicate the mean of all measurements.

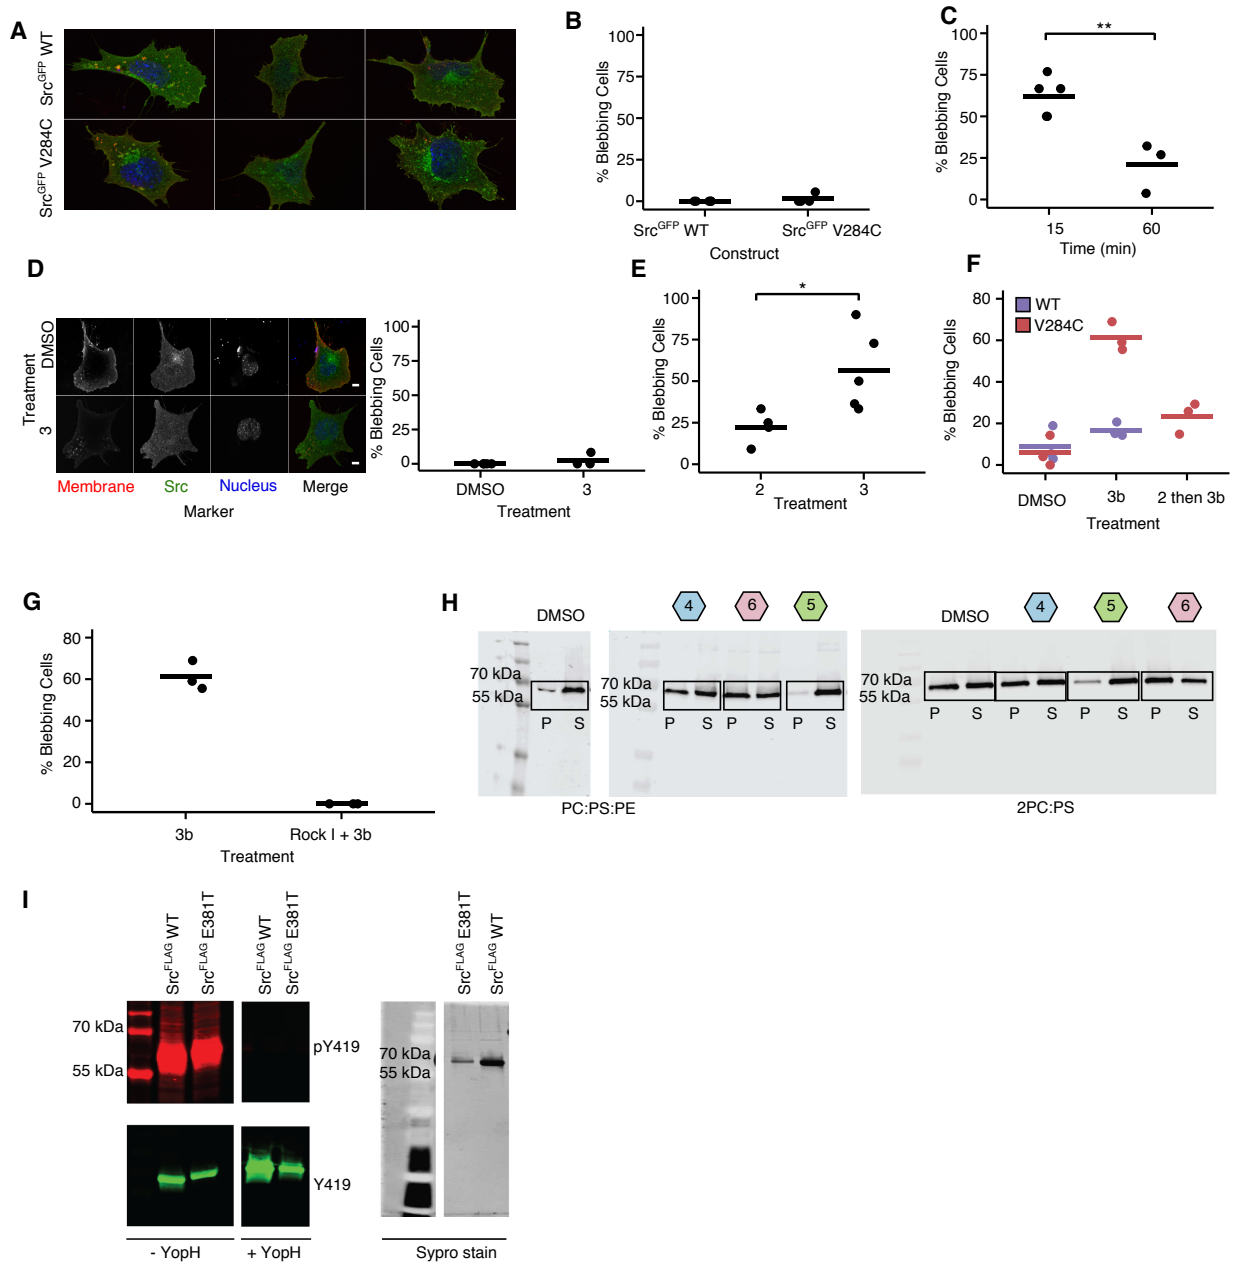

**Figure S4. Modulation of phosphotransferase-independent function of Src with CystIMATIK probes.** Related to **Figure 5**.

**A.** Three representative micrographs of untreated SYFs expressing Src<sup>GFP</sup> WT or Src<sup>GFP</sup> V284C.  
**B.** Percentage of untreated SYFs expressing Src<sup>GFP</sup> WT or Src<sup>GFP</sup> V284C with blebs.  
**C.** Percentage of SYFs expressing Src<sup>GFP</sup> V284C with blebs 15 or 60 min after treatment with **3**.  
Representative images from live cell microscopy are shown in **Figure 5B** and movies are provided as **Movie S1-2**. **D.** Representative micrographs of Src<sup>GFP</sup> WT-expressing SYFs treated for 15 min with DMSO or **3** (*left panels*). Percentage of Src<sup>GFP</sup> WT-expressing SYFs with blebs after treatment with DMSO or **3** for 15 minutes. **E.** Percentage of Src<sup>myr</sup> V284C-expressing SYFs with blebs after treatment with **2** or **3** for 15 min. **F.** Percentage of HeLa cells expressing Src<sup>myr</sup> WT or Src<sup>myr</sup> V284C with blebs after treatment with DMSO, 5  $\mu$ M **3b**, or pre-treated with **2** for 15 min, followed by **3b** (**3b** is an analog of CystIMATIK probe **3** that lacks a methyl group on the cyanoacrylamide moiety). **G.** Percentage of HeLa cells expressing Src<sup>myr</sup> V284C pre-treated with DMSO or Rock inhibitor GSK429286A, and then treated with **3b**. **H.** Representative Src (anti-Src) immunoblots for the co-sedimentation assays quantified in **Figure 5G**. (P) = pelleted and (S) = soluble Src fractions after sedimentation. Representative data for *apo* Src<sup>FLAG</sup> WT (DMSO), Src<sup>FLAG</sup> WT-4, Src<sup>FLAG</sup> WT-5 or Src<sup>FLAG</sup> WT-6 with liposomes composed of 1:1:1 phosphatidylcholine, phosphatidylserine and phosphatidylethanolamine (PC:PS:PE) or 2:1 PC and PS (2PC:PS) are shown. Pelleted and soluble Src were quantified by fitting the immunoblot signal intensity to a Src (using an anti-Src antibody) titration standard curve. **I.** Purification and characterization of non-phosphorylated Src<sup>FLAG</sup> WT and Src<sup>FLAG</sup> E381T (see **Figure S1A** and **Table S1**) from HEK293T cells. The left panels show phosphorylated (anti-pTyr419 SFK) and non-phosphorylated (anti-Tyr419 SFK) blots before (- YopH) and after (+ YopH) treatment with *Yersinia pestis* protein tyrosine phosphatase (YopH). The right panels show total protein (Sypro staining) after dephosphorylation and purification. Relates to **Figure 5G**. For **S4B-S4G**, each point represents a replicate treatment with multiple cells imaged and scored in a double-blind fashion.

Points represent individual measurements and the horizontal lines indicate the mean of all measurements. See **Table S5** for the total number of replicates and cells analyzed. \*p <0.05; \*\*p < 0.01.



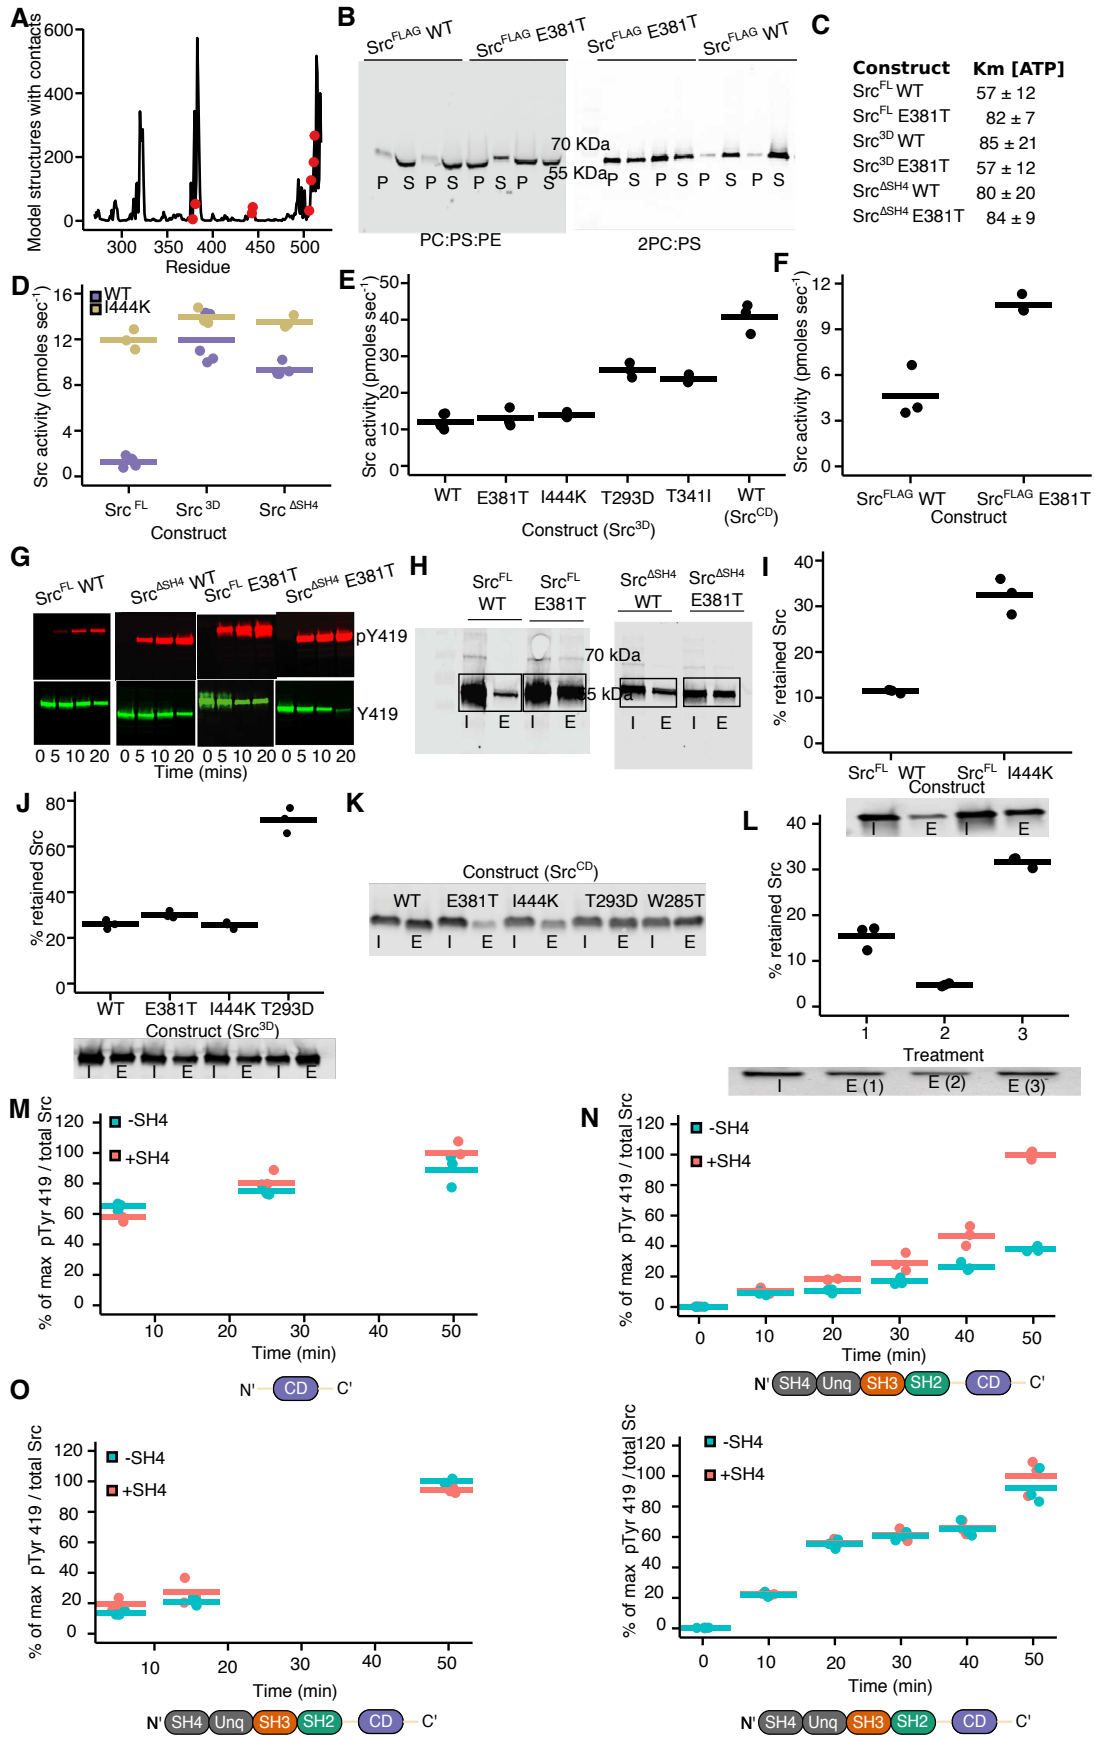

**Figure S5.** Characterization of the SH4 domain/ $\alpha$ F pocket interaction. Related to **Figure 6**.

**A.** 4,528 N-tail model structures were created with Rosetta based on the 2SRC crystal structure. Plot of the number of N-tail model structures that contact each catalytic domain residue. The red dots indicate  $\alpha$ F pocket residues. **B.** Representative Src (anti-Src) immunoblots for the co-sedimentation assays quantified in **Figure 6B**. P = pelleted and S = soluble Src fractions after sedimentation. Representative data for *apo* Src<sup>FLAG</sup> WT (DMSO) and *apo* Src<sup>FLAG</sup> E381T with liposomes composed of 1:1:1 phosphatidylcholine, phosphatidylserine and phosphatidylethanolamine (PC:PS:PE) or 2:1 PC and PS (2PC:PS) are shown. Pelleted and soluble Src were quantified by fitting the immunoblot signal intensity to a Src (using an anti-Src antibody) titration standard curve. **C.**  $K_m$  [ATP] for Src<sup>FL</sup> WT, Src<sup>FL</sup> E381T, Src<sup>3D</sup> WT, Src<sup>3D</sup> E381T, Src<sup>ASH4</sup> WT and Src<sup>ASH4</sup> E381T (n=3, mean  $\pm$  s.e.m). **D.** Phosphotransferase activity of purified Src<sup>FL</sup>, Src<sup>3D</sup> or Src<sup>ASH4</sup> with either the WT or I444K sequence. (n=4-6). Values for WT (FL and truncations) were used previously in **Figure 6C**. **E.** Phosphotransferase activity of purified Src<sup>3D</sup> comparing WT, E381T, I444K, T293D and T341I sequence (n=3-5). The phosphotransferase activity of Src<sup>CD</sup> WT is provided as reference for Src's activity in the absence of regulatory SH2 and SH3 domains. Values for Src<sup>3D</sup> WT, E381T, and I444K were shown previously in **Figures 6C, S5D**. **F.** Phosphotransferase activity of Src<sup>FLAG</sup> with either the WT or E381T sequence (n=3) purified from HEK293T cells. **G.** Representative (anti-pTyr419 SFK) (*top*) and non-phosphorylated (anti-Tyr419 SFK) (*bottom*) Src immunoblots for autophosphorylation assays quantified in **Figure 6D**. Non-phosphorylated Src variants were incubated with ATP (30  $\mu$ M) for varying times and then the ratio of pTyr419 and Tyr419 was quantified. **H.** Representative Src immunoblots for SH3 pulldown assays performed with Src<sup>ASH4</sup> WT or E381T and Src<sup>FL</sup> WT or E381T and quantified in **Figure 6E**. (I = input Src construct; E = Src construct retained after SH3 pulldown). Retained Src was quantified by fitting the immunoblot signal intensity to a Src titration standard curve. **I.** Quantification (*top panel*) and representative immunoblots (*bottom panel*) for

SH3 pulldown assays performed with Src<sup>FL</sup> WT or I444K (n=3, I = input Src construct; E = Src construct retained after SH3 pulldown). Values for Src<sup>FL</sup> WT were used previously in **Figure 6E**.

**J.** Quantification (*top panel*) and representative immunoblots (*bottom panel*) for SH3 pulldown assays performed with Src<sup>3D</sup> WT, E381T, I444K and T293D (n=3, I = input Src construct; E = Src construct retained after SH3 pulldown).

**K.** Representative immunoblots for SH4 pulldown assays performed with Src<sup>3D</sup> WT, E381T, I444K, T293D and W285T (I = input Src construct; E = Src construct retained after SH4 pulldown). Retained Src was quantified by fitting the immunoblot signal intensity to a Src titration standard curve. Relates to **Figure 6J**.

**L.** Quantification (*top panel*) and representative fluorescent gel (*bottom panel*) for SH4 pulldown assays performed with tetramethylrhodamine-labeled Src<sup>TAMRA-FL</sup> V284C (**Figure S1A** and **Table S1**) complexed to 5  $\mu$ M inhibitor **1**, **2**, or **3** (n=3, I = input Src<sup>TAMRA-FL</sup> V284C; E = Src<sup>TAMRA-FL</sup> V284C retained after SH4 pulldown). Input and eluted Src was quantified using fluorescence gel scanning.

**M.** Autophosphorylation quantification of Src<sup>CD</sup> WT in the presence of SH4<sup>SNAP</sup> (residues 1-18 of Src, +SH4, *red*) or control SNAP (-SH4, *blue*) at various time points after the addition of ATP (n=3).

**N.** Autophosphorylation quantification of Src<sup>FL</sup> WT in the presence of SH4<sup>SNAP</sup> (residues 1-18 of Src, +SH4, *red*) or control SNAP protein (-SH4, *blue*) at various time points after the addition of ATP (n=3).

**O.** Autophosphorylation quantification of Src<sup>FL</sup> E381T (*left*) and I444K (*right*) in the presence of SH4<sup>SNAP</sup> (residues 1-18 of Src, +SH4, *red*) or control SNAP protein (-SH4, *blue*) at various time points after the addition of ATP (n=3). For **S5M-S5O**, autophosphorylation was quantified by measuring the ratio of pTyr419 (anti-pTyr419 SFK) to total Src (anti-Src) by immunoblotting. Points represent individual measurements and the horizontal lines indicate the mean of all measurements.

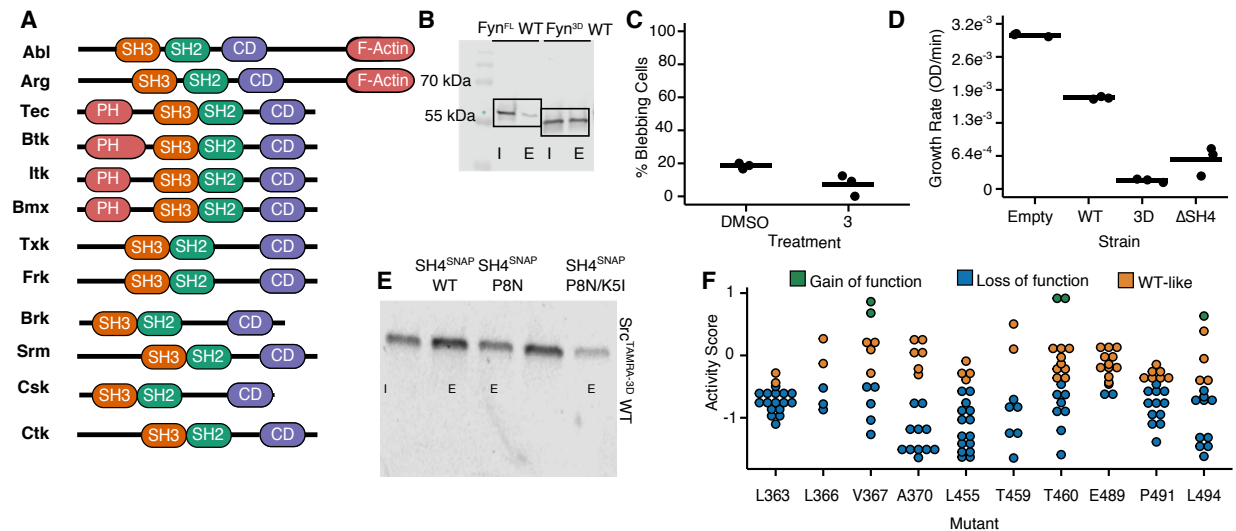

**Figure S6.** Conservation of the SH4 domain regulatory interaction amongst the SFKs. Related to **Figure 7**.

**A.** Domain organization of SH4 domain-lacking (SH4-) human non-receptor tyrosine kinases that contain an SH3/SH2/CD architecture. Relates to **Figure 7A**. **B.** Representative Fyn immunoblots (anti-Tyr419 SFK) for SH3 pulldown assays performed with Fyn<sup>FL</sup> WT or Fyn<sup>3D</sup> WT. Quantified in **Figure 7C**. (I = input Fyn construct; E = Fyn construct retained after SH3 pulldown). Retained Fyn was quantified by fitting the immunoblot signal intensity to a Fyn (anti-Tyr419 SFK) titration standard curve. **C.** Percentage of Fyn<sup>myr</sup> WT-expressing SYF cells with blebs after treatment with DMSO or **3**. **D.** Quantification of growth rates in yeast strains expressing Src<sup>FL</sup> WT, Src<sup>3D</sup> WT, Src<sup>ΔSH4</sup> WT, or empty vector control (n=3). **E.** Representative fluorescent gel of SH4 pulldown assays performed with tetramethylrhodamine-labeled Src<sup>TAMRA-3D</sup> WT and immobilized SH4<sup>SNAP</sup> (residues 1-18 of Src) variants (WT, P8N or P8N/K5I). Quantified in **Figure 7F** (n=3, I = input Src<sup>TAMRA-3D</sup> WT; E = Src<sup>TAMRA-3D</sup> WT retained after SH4 pulldown). **F.** Activity scores of Src residues that overlay with Abl's myristoyl-binding pocket (as defined in Cowan-Jacob, 2005). Most variants in this region are loss-of-function or WT-like. Points represent individual measurements and the horizontal lines indicate the mean of all measurements. See **Table S5** for the number of cells for all cellular blebbing quantifications.

**Table S1.** List of constructs and mutations used in manuscript. Relates to all Figures.

| Construct | Expressed in                               | Residue numbers | Global Conformation relative to WT or FL | Activity relative to WT or FL | Vectors used in                            | Notes                         | Citation                  |
|-----------|--------------------------------------------|-----------------|------------------------------------------|-------------------------------|--------------------------------------------|-------------------------------|---------------------------|
| Src WT    | E. coli, S. cerevisiae, HeLa, SYF, HEK293T | 1-536           | Same                                     | Same                          | P415 GAL1, pMCSG7, pcDNA3.3, pEF1A, pcDNA5 |                               |                           |
| Src V284C | E. coli, HEK293T, HeLa, SYF                | /               | Not measured                             | Same                          | pET-28a, pMCSG7, pEF1A                     | CystIMATI K mutation          | This study                |
| Src K298M | S. cerevisiae                              | /               | Not measured                             | Less                          | P415 GAL1                                  | Catalytically-inactive mutant | Florio <i>et al.</i> 1994 |
| Src T341I | S. cerevisiae, HeLa                        | /               | Not measured                             | More                          | P415 GAL1, pcDNA5                          | Gatekeeper mutant             | Azam <i>et al.</i> 2008   |
| Src E381T | E. coli, S. cerevisiae, HEK293T, HeLa, SYF | /               | More open                                | More                          | pMCSG7, P415 GAL1, pcDNA3.3, pEF1A, pcDNA5 | $\alpha$ F pocket mutant      | This study                |
| Src I444K | E. coli, HEK293T                           | /               | More open                                | More                          | pMCSG7                                     | $\alpha$ F pocket mutant      | This study                |
| Src T293D | E. coli                                    | /               | More open                                | More                          | pMCSG7                                     | SH3-interface mutant          | This study                |
| Src D368K | E. coli                                    | /               | More open                                | More                          | pMCSG7                                     | SH2-interface                 | This study                |
| Src N471Y | S. cerevisiae, HEK293T                     | /               | Not measured                             | Less                          | P415 GAL1, pEF1A                           | Activity score = -1.3         | This study                |
| Src P491G | S. cerevisiae, HEK293T                     | /               | Not measured                             | Less                          | P415 GAL1, pEF1A                           | Activity score = -0.9         | This study                |
| Src G398T | S. cerevisiae, HEK293T                     | /               | Not measured                             | Same                          | P415 GAL1, pEF1A                           | Activity score = 0            | This study                |
| Src V274A | S. cerevisiae, HEK293T                     | /               | Not measured                             | More                          | P415 GAL1, pEF1A                           | Activity score = 1.9          | This study                |
| Src G2A   | SYF                                        | /               | Not measured                             | Less                          | pEF1A                                      | Unable to be                  | Kamps <i>et al.</i> 1985  |

|                      |                              |                            |              |              |                   |                                                                       |                           |
|----------------------|------------------------------|----------------------------|--------------|--------------|-------------------|-----------------------------------------------------------------------|---------------------------|
|                      |                              |                            |              |              |                   | myristoylated                                                         |                           |
| Src <sup>K445C</sup> | E. coli                      | /                          | Not measured | Same         | pMCSG7            | Used in maleimide labeling                                            | This study                |
| Src <sup>GFP</sup>   | SYF, HeLa                    | 1-536 with full length GFP | Not measured | Not measured | pEF1A             | C-terminal GFP tag with GSGTGS GTAT                                   | Patwardhan and Resh, 2010 |
| Src <sup>FLAG</sup>  | HEK293T                      | 1-536 with FLAG tag        | Not measured | More         | pcDNA3.3          | C-terminal FLAG with linker sequence GSGT in between Src and FLAG tag |                           |
| Src <sup>myr</sup>   | S. cerevisiae, HEK293T, HeLa | 1-536                      | Not measured | Same         | P415 GAL1, pcDNA5 | Co-translationally myristoylated on G2                                |                           |
| Src <sup>FL</sup>    | E. coli                      | 2-536                      | Same         | Same         | pMCSG7            | N-terminal His6-SUMO tag gets cleaved                                 | This study                |
| Src <sup>ΔSH4</sup>  | E. coli, S. cerevisiae       | 19-536                     | More open    | More         | pMCSG7, P415 GAL1 | N-terminal His6-SUMO tag gets cleaved                                 | This study                |
| Src <sup>3D</sup>    | E. coli, S. cerevisiae       | 87-536                     | More open    | More         | pMCSG7, P415 GAL1 | N-terminal His6-SUMO tag gets cleaved                                 |                           |
| Src <sup>CD</sup>    | E. coli                      | 261-536                    | NA           | More         | pET28a, pMCSG7    | N-terminal His6-SUMO tag gets cleaved                                 | This study                |
| Fyn <sup>myr</sup>   | SYF                          | 1-537                      | Not measured | Not measured | pEF1A             | C-terminal IRES-EGFP                                                  | This study                |

|                         |         |        |              |              |        |                                                                     |            |
|-------------------------|---------|--------|--------------|--------------|--------|---------------------------------------------------------------------|------------|
| Fyn <sup>FL</sup>       | E. coli | 2-537  | Not measured | Same         | pMCSG7 | N-terminal His6-SUMO tag gets cleaved                               | This study |
| Fyn <sup>3D</sup>       | E. coli | 85-537 | Not measured | More         | pMCSG7 | N-terminal His6-SUMO tag gets cleaved                               | This study |
| Src <sup>TAMRA-FL</sup> | E. coli | 2-536  | Same         | Not measured | pMCSG7 | N-terminal TAMRA label with LPYTG sequence prior to G2              | This study |
| Src <sup>TAMRA-3D</sup> | E. coli | 87-536 |              |              | pMCSG7 | N-terminal TAMRA label with LPYTG sequence prior to T87             | This study |
| SH4 <sup>SNAP</sup>     | E.coli  | 2-18   | NA           | NA           | pMCSG7 | SH4 domain with C-terminal SNAP tag with a linker LPETGG in between | This study |

**Table S3.** Essential Src catalytic domain residues (defined as >90% of nonsynonymous mutations are classified as “loss of function”). At least 5 mutations must be measured. Relates to Figure 2F.

| <b>Residue</b> | <b>Notes</b>                                     |
|----------------|--------------------------------------------------|
| G277           | Glycine-rich loop                                |
| G279           | Glycine-rich loop                                |
| F281           | Glycine-rich loop                                |
| G282           | Glycine-rich loop                                |
| V284           | C-spine                                          |
| A296           | C-spine                                          |
| K298           | Involved in catalytic B3- $\alpha$ C salt bridge |
| M305           |                                                  |
| F310           |                                                  |
| E313           | Involved in catalytic B3- $\alpha$ C salt bridge |
| A314           |                                                  |
| M317           | R-spine                                          |
| K318           |                                                  |
| L320           |                                                  |
| L328           | R-spine                                          |
| P336           |                                                  |
| G376           |                                                  |
| H387           | R-Spine, HRD motif, catalytic loop               |
| R388           | HRD motif, catalytic loop                        |
| D389           | HRD motif, catalytic loop                        |
| R391           | Catalytic loop                                   |
| N394           | Catalytic loop                                   |
| L396           | C-spine                                          |
| V397           | C-spine                                          |
| A406           | xDFG residue                                     |
| D407           | DFG motif                                        |
| F408           | DFG motif                                        |



|      |                                 |
|------|---------------------------------|
| G409 | DFG motif                       |
| L410 |                                 |
| A411 |                                 |
| R412 | Electrostatic switch            |
| Y419 | Activation loop tyrosine        |
| A421 | Anchor point 2                  |
| G424 |                                 |
| F427 |                                 |
| P428 | Interacts with substrate        |
| K430 | P + 1 loop                      |
| W431 | P + 1 loop                      |
| T432 | P + 1 loop                      |
| E435 | P + 1 loop                      |
| S446 |                                 |
| D447 | R-spine                         |
| E457 |                                 |
| P465 |                                 |
| N471 |                                 |
| R509 | Conserved salt bridge with D407 |

**Table S5.** Values for cellular blebbing. Relates to Figures 3G, 5A, 5C, 5D, 5E, 7D, S4B, S4C, S4D, S4E, S4F, and S6C.

| Figure | Condition (in SYF cells unless otherwise noted) | n  | Total # cells scored |
|--------|-------------------------------------------------|----|----------------------|
| 3G     | Src <sup>FL</sup> WT                            | 6  | 176                  |
| 3G     | Src <sup>FL</sup> E381T                         | 11 | 140                  |
| 5A     | Src <sup>GFP</sup> V284C +DMSO                  | 4  | 51                   |
| 5A     | Src <sup>GFP</sup> V284C + 1                    | 3  | 51                   |
| 5A     | Src <sup>GFP</sup> V284C + 2                    | 9  | 138                  |
| 5A     | Src <sup>GFP</sup> V284C +3                     | 5  | 88                   |
| 5A     | Src <sup>GFP</sup> V284C 2 then 3               | 5  | 56                   |
| 5C     | Src <sup>GFP</sup> V284C +DMSO                  | 4  | 51                   |
| 5C     | Src <sup>GFP</sup> V284C + 1 $\mu$ M            | 4  | 45                   |
| 5C     | Src <sup>GFP</sup> V284C + 3 $\mu$ M            | 3  | 35                   |
| 5C     | Src <sup>GFP</sup> V284C + 10 $\mu$ M           | 5  | 88                   |
| 5D     | Src <sup>GFP</sup> V284C + Rock I               | 5  | 58                   |
| 5D     | Src <sup>GFP</sup> V284C + Rock I + 3           | 3  | 33                   |
| 5E     | Src <sup>GFP</sup> G2A/V284C + DMSO             | 3  | 64                   |
| 5E     | Src <sup>GFP</sup> G2A/V284C + 3                | 3  | 39                   |
| 7D     | Fyn <sup>myr</sup> V284C + DMSO                 | 4  | 53                   |
| 7D     | Fyn <sup>myr</sup> V284C + 3                    | 7  | 96                   |
| S4B    | Src <sup>GFP</sup> WT                           | 6  | 176                  |
| S4B    | Src <sup>GFP</sup> V284C                        | 4  | 51                   |
| S4C    | Src <sup>GFP</sup> V284C + 15 min               | 5  | 88                   |
| S4C    | Src <sup>GFP</sup> V284C + 60 min               | 3  | 81                   |
| S4D    | Src <sup>GFP</sup> WT + DMSO                    | 5  | 176                  |
| S4D    | Src <sup>GFP</sup> WT + 3                       | 3  | 59                   |
| S4E    | Src <sup>myr</sup> V284C + 2                    | 4  | 48                   |
| S4E    | Src <sup>myr</sup> V284C + 3                    | 5  | 51                   |
| S4F    | Src <sup>myr</sup> V284C +DMSO (HeLa)           | 3  | 80                   |
| S4F    | Src <sup>myr</sup> V284C +3b (HeLa)             | 3  | 182                  |
| S4F    | Src <sup>myr</sup> V284C +2 then 3b (HeLa)      | 3  | 99                   |
| S4F    | Src <sup>myr</sup> WT+DMSO (HeLa)               | 3  | 107                  |
| S4F    | Src <sup>myr</sup> WT +3b (HeLa)                | 3  | 80                   |
| S6C    | Fyn <sup>myr</sup> WT + DMSO                    | 3  | 38                   |
| S6C    | Fyn <sup>myr</sup> WT + 3                       | 3  | 30                   |
